# Supplementary material for: Debugging Optimized Code Via Tailoring (Abstract).
Source: Royal Society of Chemistry journal article supplement (doi:10.1039/c0cc05587e), 1994-01-01
Supplement: c0cc05587e.pdf [file c0cc05587e.pdf]

## SUPPORTING INFORMATION

# Isolation and structural characterization of magic silver clusters protected by 4-(*tert*-butyl)benzyl mercaptans

Yuichi Negishi,<sup>\*a</sup> Rio Arai<sup>a</sup>, Yoshiki Niihori<sup>a</sup> and Tatsuya Tsukuda<sup>b</sup>

<sup>a</sup> Department of Applied Chemistry, Faculty of Science, Tokyo University of Science, 1-3 Kagurazaka, Shinjuku-ku, Tokyo, 162-8601, Japan.

Fax: +81-3-5261-4631; Tel: +81-3-5228-9145; E-mail: negishi@rs.kagu.tus.ac.jp

<sup>b</sup> Catalysis Research Center, Hokkaido University, Nishi, 10, Kita 21, Supporo 001-0021, Japan.

## I. Experimental Procedure

### A. Chemicals

All of the chemicals were commercially obtained and used without further purification. Silver nitrate (AgNO<sub>3</sub>), sodium tetrahydroborate (NaBH<sub>4</sub>), methanol, toluene, tetrahydrofuran (THF), and dichloromethane (CH<sub>2</sub>Cl<sub>2</sub>) were obtained from Wako Pure Chemical Industries. 4-(*tert*-butyl)benzyl mercaptan (BBSH, Scheme S1) were purchased from Aldrich. Deionized water with a resistivity of > 18 MΩ cm was used in the present study.

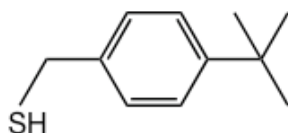

**Scheme S1** Molecular structure of 4-(*tert*-butyl)benzyl mercaptan (BBSH)

### B. Synthesis of Ag:SBB clusters (1)

All operations were performed under pure Ar atmosphere. First, AgNO<sub>3</sub> (1.6 mmol, 273 mg) was dissolved in 44 mL THF and the resulting solution was cooled to 0 °C in an ice bath. Then, BBSH (8 mmol) was added to the solution under slow stirring (~ 30 rpm). The colorless solution gradually became cloudy white, indicating the formation of Ag-SBB oligomers. After 15 h, the stirring speed was increased (~ 1300 rpm) and an aqueous solution of NaBH<sub>4</sub> (16 mmol, 2 mL) at 0 °C was rapidly added at once. The solution's color immediately changed to deep purple, indicating the formation of Ag:SBB clusters. The solution was stirred for 2 h. After the removal of the precipitates (by-products), the solution was concentrated and methanol (20 mL) was added. The collected precipitates (**1**) were thoroughly washed with methanol. 230 mg of cluster **1** was obtained.

### C. Ripening of cluster 1 with BBSH

Cluster **1** (230 mg) was incubated in neat BBSH (15 mL) at 40, 60, or 80 °C with vigorous stirring under Ar atmosphere. The incubated samples were washed with methanol and then centrifuged with dichloromethane to remove by-products (materials insoluble in organic solvents). Typically, 60-70 mg of cluster **2** was obtained. Cluster **2** could be dispersed in THF, toluene, benzene, hexane, and chloroform, but could not in acetone, acetonitrile, and methanol.

### D. Characterization

Transmission electron microscopy (TEM) images were recorded using an electron microscope operated at 100 kV (Hitachi, H-7650); typical magnification of the images was 100,000x. High-resolution TEM (HR-TEM) images were recorded using an electron microscope operated at 300 kV (JEOL, JEM-3200); typical magnification of the images was 300,000x. Electrospray ionization (ESI) mass spectra were recorded using a custom-designed time-of-flight (TOF)

system.<sup>1)</sup> For the ESI mass analysis, dichloromethane solutions of the clusters with concentrations of 1 mg/mL were electrosprayed into the ambient atmosphere through the stainless steel needle of a syringe biased at ca. +3 kV. The charged liquid droplets were fed into a capillary and heated resistively to ca. 180 °C to form intact cluster ions via desolvation. Laser desorption/ionization (LDI) mass spectra were collected on a linear-mode TOF mass spectrometer (Applied Biosystem, Voyager Linear RD VDA 500) using a nitrogen laser (337 nm). Gel permeation chromatography (GPC) experiments were performed with an instrument that included a Waters controller (Waters, Waters 600), a pump (Waters, Waters 626), and a UV-Vis detector (Waters, Waters 486), using a stainless steel column (Waters, Stragel HR2). The mobile phase was toluene having a flow rate of 2.0 mL/min. UV-Vis absorption spectra of the clusters were recorded in dichloromethane at the ambient temperature by using a double-beam spectrometer (JASCO, V-630). X-ray photoelectron spectra were collected using an electron spectrometer (JEOL, JPS-9010MC) equipped with a chamber at a base pressure of  $\sim 2 \times 10^{-8}$  Torr. X-rays from the Mg-K $\alpha$  line at 1253.6 eV were used for the excitation. X-ray diffraction measurements were performed on a Rigaku Rint2500, using CuK $\alpha$  radiation ( $\lambda = 1.54$  Å). Thermogravimetric analysis (TGA) was performed on a TG analyzer (Bruker, TGA2000SA) at a heating rate of 5 °C/min in the temperature range 25–500 °C. Ag<sub>280</sub>(SBB)<sub>120</sub> (8.8 mg) was used in the measurement.

## II. Results

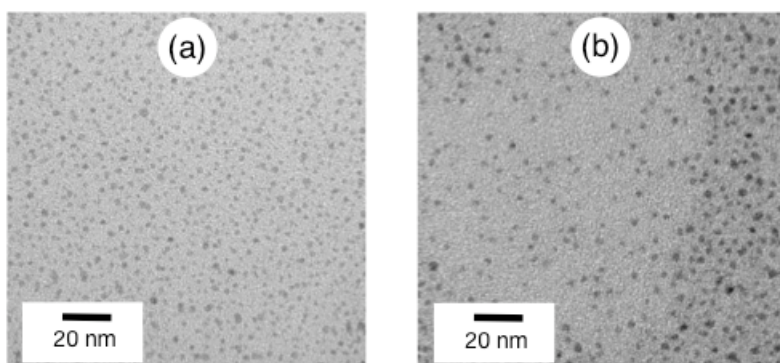

**Fig. S1** TEM photographs of (a) **1** and (b) **2**.

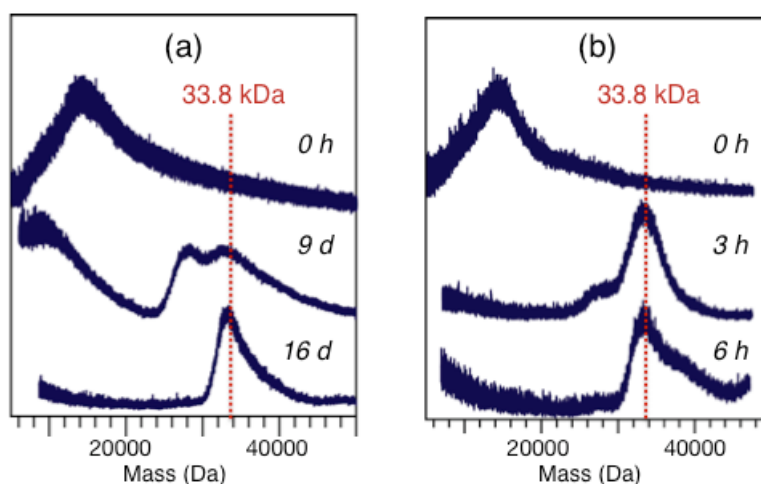

**Fig. S2** Positive-ion LDI mass spectra of Ag:SBB clusters produced by the reaction of **1** with BBSH with respect to incubation time; (a) reaction temperature is 40 °C and (b) that is 80 °C. In the mass spectra, 33.8 kDa peaks are attributed to laser fragment ions of 51.8 kDa clusters (see Fig. 2(d)).

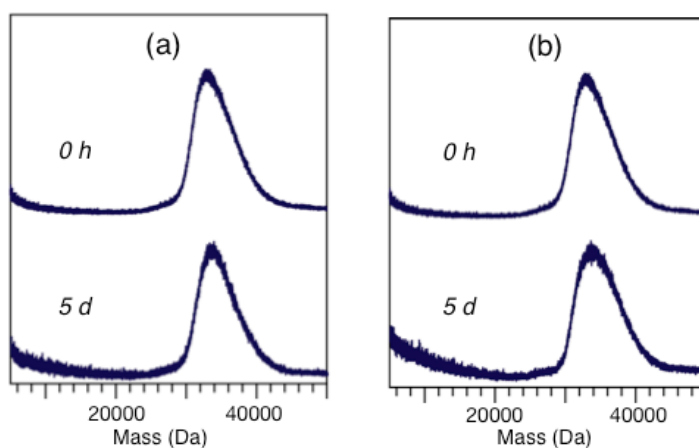

**Fig. S3** Positive-ion LDI mass spectra of cluster **2** stored in air as (a) solid form and (b) dispersed in toluene.

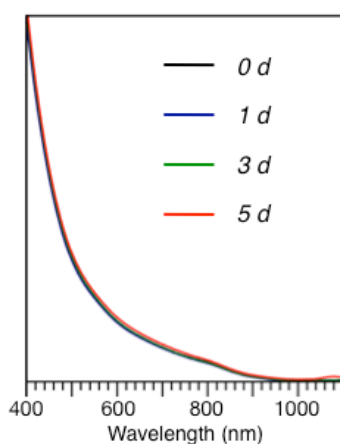

**Fig. S4** Time dependence of optical absorption spectrum of a toluene solution of cluster **2** at ambient temperature.

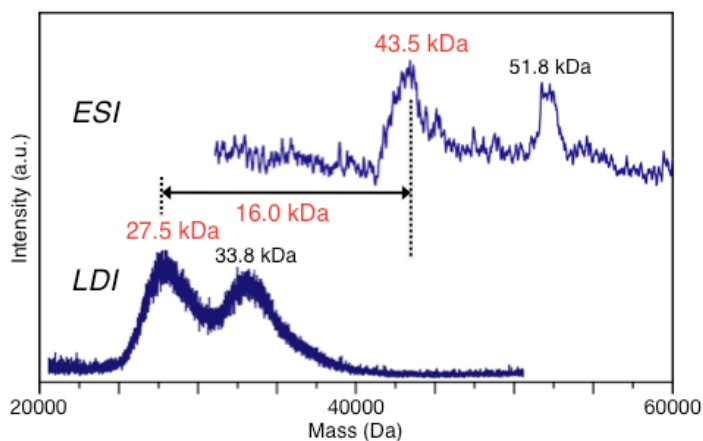

**Fig. S5** Positive-ion LDI mass spectrum of a mixture of 43.5 kDa cluster and 51.8 kDa cluster. The ESI mass spectrum of a mixture is also shown for comparison. In the LDI mass spectrum, 27.5 kDa peak is assigned to laser fragment ions of 43.5 kDa clusters. A decrease in the mass of 16 kDa corresponds to dissociation of  $\sim 108$  BBS aryl group. Thus, the chemical composition of 43.5 kDa cluster can be approximated as  $\text{Ag}_{-223}(\text{SBB})_{-108}$ .

## References

1. Y. Negishi, K. Nobusada and T. Tsukuda, *J. Am. Chem. Soc.*, 2005, **127**, 5261-5270
